# Supplementary material for: Tackling Burkholderia cepacia complex bloodstream infections: Clinical epidemiology, genospecies distribution and novel drug susceptibility in Taiwan
Source: Research Square preprint supplement (doi:10.21203/rs.3.rs-6520514/v1), 2025-05-27
Supplement: Supplementary file 1 [file 18a30b39e721775f00d88aab.docx]

Supplementary Table. Multivariate logistic regression of mortality in BCC BSIs patients receiving different monotherapy

| Treatment | 7-day mortality | | 14-day mortality | | | 28-day mortality | | |
| --- | --- | --- | --- | --- | --- | --- | --- | --- |
| aOR(95% CI) | *P* value | aOR (95% CI) | *P* value | aOR (95% CI) | | *P* value |
| Ceftazidime (reference) | 1 | - | 1 | - | 1 | | - |
| Meropenem | 18.87  (0.77-461.10) | 0.07 | 3.04  (0.25-37.00) | 0.38 | 2.49  (0.39-15.80) | | 0.33 |
| TMP/SMX | 7.64  (0.25-231.91) | 0.24 | 8.10  (0.36-183.72) | 0.19 | 1.39  (0.14-13.92) | | 0.78 |

aHR, adjusted hazard ratio; TMP/SMX, trimethoprim/sulfamethoxazole.
